# Supplementary material
Source: PubMed Central journal article supplement (PMC2941338)
Supplement: 1004213107_pnas.1004213107_SI.pdf [file 1004213107_pnas.1004213107_SI.pdf]

# Supporting Information

Isom et al. 10.1073/pnas.1004213107

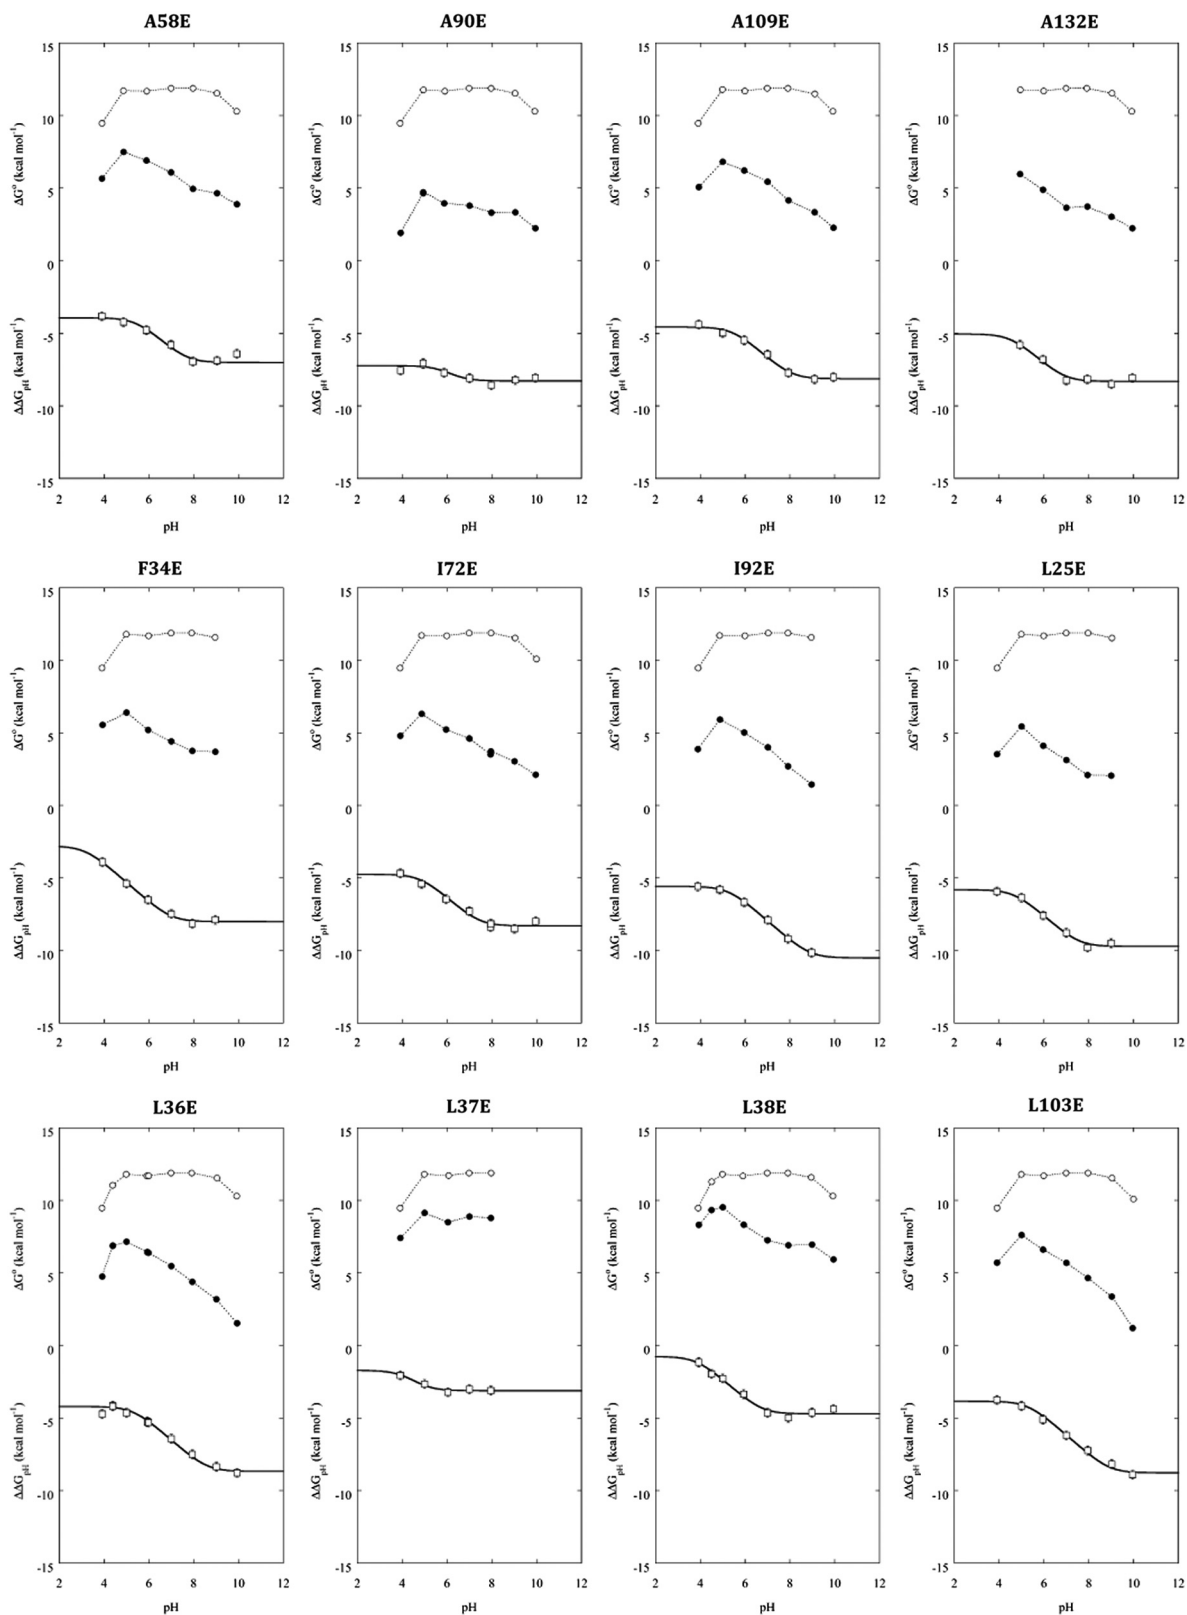

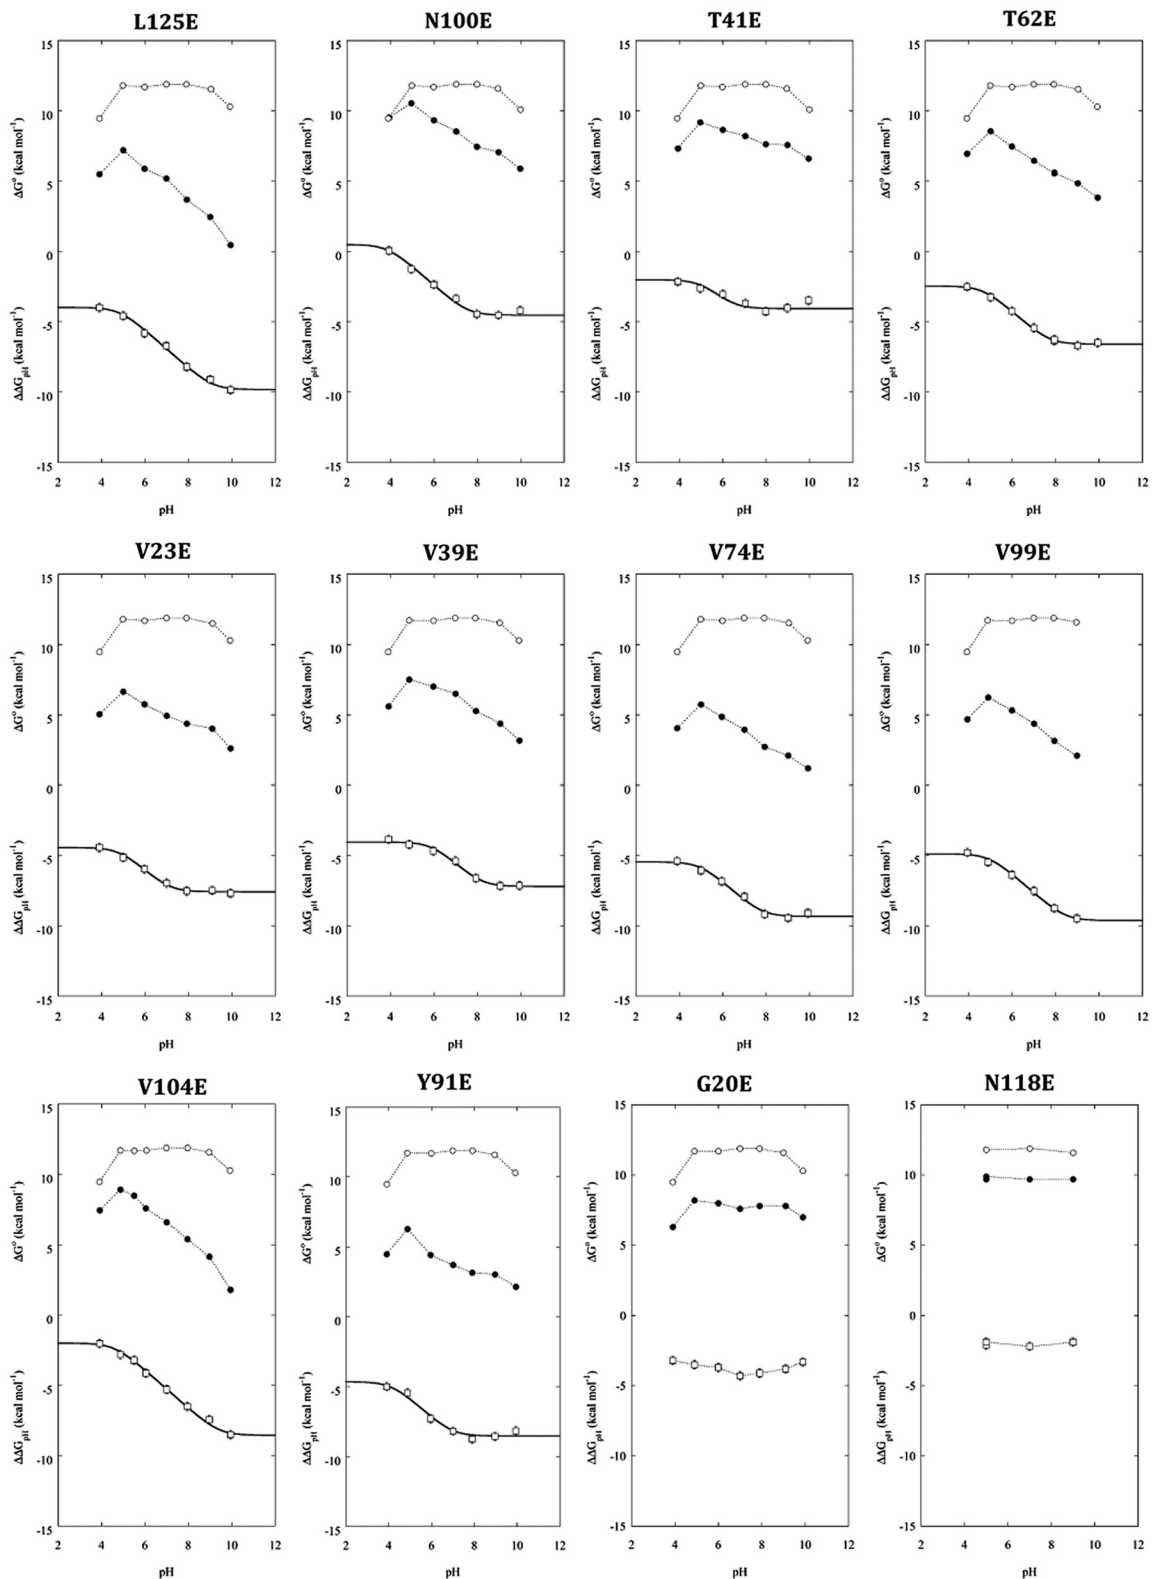

**Fig. S1.** Graphs of pH dependence of thermodynamic stability of Glu-containing variants. Unfolding free energies ( $\Delta G^\circ$ ) for the  $\Delta$ +PHS reference protein (circle) and for each Glu-containing variant (solid circle) determined at several pH values by chemical denaturation with guanidinium chloride at 298 K. The dotted lines are meant to guide the eye. The uncertainty in each measured value is represented by the size of the data points.  $\Delta\Delta G_{pH}$  is the difference in the unfolding free energy of the Glu-containing variant and of the  $\Delta$ +PHS reference protein. The error bars in each  $\Delta\Delta G_{pH}$  value represent the combined error of the individual  $\Delta G^\circ$  measurements. The solid line in the  $\Delta\Delta G_{pH}$  vs. pH data represents the fit of Eq. 2 in 1, used to determine the  $pK_a$  values of each Glu residue.

1 Karp DA, et al. (2007) High apparent dielectric constant inside a protein reflects structural reorganization coupled to the ionization of an internal Asp. *Biophys J* 92:2041–2053.

**Table S1. Thermodynamic stability ( $\Delta G^{\circ}_{\text{H}_2\text{O}}$ ) measured for the reference protein ( $\Delta$ +PHS nuclease) and for Glu-containing variants of  $\Delta$ +PHS nuclease.**

| PROTEINS           | pH   | $C_m$ [M]* | $m$ (kcal mol <sup>-1</sup> M <sup>-1</sup> ) <sup>†</sup> | $\Delta G^{\circ}_{\text{H}_2\text{O}}$ (kcal/mol) <sup>‡</sup> | $\Delta\Delta G^{\circ}_{\text{H}_2\text{O}}$ (kcal/mol) <sup>§</sup> |
|--------------------|------|------------|------------------------------------------------------------|-----------------------------------------------------------------|-----------------------------------------------------------------------|
| $\Delta$ +PHS      | 3.9  |            |                                                            | 9.5                                                             |                                                                       |
| $\Delta$ +PHS      | 4.4  |            |                                                            | 11.0                                                            |                                                                       |
| $\Delta$ +PHS      | 4.5  |            |                                                            | 11.2                                                            |                                                                       |
| $\Delta$ +PHS      | 4.9  |            |                                                            | 11.8                                                            |                                                                       |
| $\Delta$ +PHS      | 5.0  |            |                                                            | 11.8                                                            |                                                                       |
| $\Delta$ +PHS      | 5.5  |            |                                                            | 11.7                                                            |                                                                       |
| $\Delta$ +PHS      | 5.9  |            |                                                            | 11.7                                                            |                                                                       |
| $\Delta$ +PHS      | 6.0  |            |                                                            | 11.7                                                            |                                                                       |
| $\Delta$ +PHS      | 7.0  |            |                                                            | 11.9                                                            |                                                                       |
| $\Delta$ +PHS      | 7.9  |            |                                                            | 11.9                                                            |                                                                       |
| $\Delta$ +PHS      | 8.0  |            |                                                            | 11.9                                                            |                                                                       |
| $\Delta$ +PHS      | 9.0  |            |                                                            | 11.5                                                            |                                                                       |
| $\Delta$ +PHS      | 9.1  |            |                                                            | 11.5                                                            |                                                                       |
| $\Delta$ +PHS      | 9.9  |            |                                                            | 10.3                                                            |                                                                       |
| $\Delta$ +PHS      | 10.0 |            |                                                            | 10.1                                                            |                                                                       |
| $\Delta$ +PHS/G20E | 3.9  | 1.3 (0.1)  | 4.7 (0.1)                                                  | 6.3 (0.1)                                                       | -3.2 (0.2)                                                            |
| $\Delta$ +PHS/G20E | 4.9  | 1.6 (0.1)  | 5.1 (0.1)                                                  | 8.2 (0.1)                                                       | -3.5 (0.2)                                                            |
| $\Delta$ +PHS/G20E | 6.0  | 1.5 (0.1)  | 5.2 (0.1)                                                  | 8.0 (0.1)                                                       | -3.7 (0.2)                                                            |
| $\Delta$ +PHS/G20E | 7.0  | 1.5 (0.1)  | 5.1 (0.1)                                                  | 7.6 (0.2)                                                       | -4.3 (0.2)                                                            |
| $\Delta$ +PHS/G20E | 7.9  | 1.5 (0.1)  | 5.1 (0.1)                                                  | 7.8 (0.2)                                                       | -4.1 (0.2)                                                            |
| $\Delta$ +PHS/G20E | 9.1  | 1.5 (0.1)  | 5.2 (0.1)                                                  | 7.8 (0.1)                                                       | -3.8 (0.2)                                                            |
| $\Delta$ +PHS/G20E | 10.0 | 1.3 (0.1)  | 5.5 (0.1)                                                  | 7.0 (0.1)                                                       | -3.3 (0.2)                                                            |
| $\Delta$ +PHS/V23E | 3.9  | 1.0 (0.1)  | 5.0 (0.1)                                                  | 5.0 (0.1)                                                       | -4.4 (0.2)                                                            |
| $\Delta$ +PHS/V23E | 5.0  | 1.2 (0.1)  | 5.7 (0.1)                                                  | 6.7 (0.1)                                                       | -5.1 (0.2)                                                            |
| $\Delta$ +PHS/V23E | 6.0  | 1.0 (0.1)  | 5.6 (0.1)                                                  | 5.7 (0.1)                                                       | -6.0 (0.2)                                                            |
| $\Delta$ +PHS/V23E | 7.0  | 0.8 (0.1)  | 6.0 (0.2)                                                  | 4.9 (0.2)                                                       | -7.0 (0.2)                                                            |
| $\Delta$ +PHS/V23E | 7.9  | 0.7 (0.1)  | 5.9 (0.1)                                                  | 4.4 (0.1)                                                       | -7.5 (0.2)                                                            |
| $\Delta$ +PHS/V23E | 9.1  | 0.7 (0.1)  | 6.0 (0.2)                                                  | 4.0 (0.1)                                                       | -7.5 (0.2)                                                            |
| $\Delta$ +PHS/V23E | 10.0 | 0.4 (0.1)  | 6.4 (0.2)                                                  | 2.6 (0.1)                                                       | -7.7 (0.2)                                                            |
| $\Delta$ +PHS/L25E | 3.9  | 0.7 (0.1)  | 5.0 (0.1)                                                  | 3.5 (0.1)                                                       | -5.9 (0.2)                                                            |
| $\Delta$ +PHS/L25E | 5.0  | 0.9 (0.1)  | 5.8 (0.1)                                                  | 5.4 (0.1)                                                       | -6.4 (0.2)                                                            |
| $\Delta$ +PHS/L25E | 6.0  | 0.8 (0.1)  | 5.5 (0.2)                                                  | 4.1 (0.2)                                                       | -7.6 (0.2)                                                            |
| $\Delta$ +PHS/L25E | 7.0  | 0.6 (0.1)  | 5.4 (0.3)                                                  | 3.1 (0.2)                                                       | -8.8 (0.2)                                                            |
| $\Delta$ +PHS/L25E | 8.0  | 0.5 (0.1)  | 4.3 (0.2)                                                  | 2.1 (0.2)                                                       | -9.8 (0.2)                                                            |
| $\Delta$ +PHS/L25E | 9.0  | 0.5 (0.1)  | 4.4 (0.1)                                                  | 2.1 (0.2)                                                       | -9.5 (0.2)                                                            |
| $\Delta$ +PHS/F34E | 3.9  | 1.1 (0.1)  | 4.9 (0.1)                                                  | 5.6 (0.1)                                                       | -3.9 (0.2)                                                            |
| $\Delta$ +PHS/F34E | 5.0  | 1.1 (0.1)  | 5.6 (0.1)                                                  | 6.4 (0.2)                                                       | -5.4 (0.3)                                                            |
| $\Delta$ +PHS/F34E | 6.0  | 0.9 (0.1)  | 5.7 (0.1)                                                  | 5.2 (0.1)                                                       | -6.5 (0.2)                                                            |
| $\Delta$ +PHS/F34E | 7.0  | 0.7 (0.1)  | 6.3 (0.1)                                                  | 4.4 (0.1)                                                       | -7.5 (0.2)                                                            |
| $\Delta$ +PHS/F34E | 7.9  | 0.7 (0.1)  | 5.6 (0.1)                                                  | 3.8 (0.1)                                                       | -8.1 (0.2)                                                            |
| $\Delta$ +PHS/F34E | 9.0  | 0.6 (0.1)  | 5.8 (0.1)                                                  | 3.7 (0.1)                                                       | -7.9 (0.2)                                                            |
| $\Delta$ +PHS/L36E | 3.9  | 1.0 (0.1)  | 4.9 (0.1)                                                  | 4.8 (0.1)                                                       | -4.7 (0.2)                                                            |
| $\Delta$ +PHS/L36E | 4.4  | 1.3 (0.1)  | 5.2 (0.1)                                                  | 6.9 (0.1)                                                       | -4.2 (0.2)                                                            |
| $\Delta$ +PHS/L36E | 5.0  | 1.3 (0.1)  | 5.4 (0.1)                                                  | 7.2 (0.1)                                                       | -4.6 (0.2)                                                            |
| $\Delta$ +PHS/L36E | 6.0  | 1.1 (0.1)  | 5.7 (0.1)                                                  | 6.4 (0.1)                                                       | -5.3 (0.2)                                                            |
| $\Delta$ +PHS/L36E | 7.0  | 0.9 (0.1)  | 5.9 (0.1)                                                  | 5.5 (0.1)                                                       | -6.4 (0.2)                                                            |
| $\Delta$ +PHS/L36E | 7.9  | 0.7 (0.1)  | 6.1 (0.1)                                                  | 4.4 (0.1)                                                       | -7.5 (0.2)                                                            |
| $\Delta$ +PHS/L36E | 9.0  | 0.5 (0.1)  | 6.4 (0.1)                                                  | 3.2 (0.1)                                                       | -8.4 (0.2)                                                            |
| $\Delta$ +PHS/L36E | 9.9  | 0.2 (0.1)  | 7.7 (0.1)                                                  | 1.5 (0.1)                                                       | -8.8 (0.2)                                                            |
| $\Delta$ +PHS/L37E | 3.9  | 1.6 (0.1)  | 4.6 (0.1)                                                  | 7.4 (0.1)                                                       | -2.1 (0.2)                                                            |
| $\Delta$ +PHS/L37E | 5.0  | 1.8 (0.1)  | 5.1 (0.1)                                                  | 9.1 (0.2)                                                       | -2.7 (0.3)                                                            |
| $\Delta$ +PHS/L37E | 6.0  | 1.7 (0.1)  | 5.0 (0.1)                                                  | 8.5 (0.1)                                                       | -3.2 (0.2)                                                            |
| $\Delta$ +PHS/L37E | 7.0  | 1.7 (0.1)  | 5.1 (0.1)                                                  | 8.9 (0.1)                                                       | -3.0 (0.2)                                                            |
| $\Delta$ +PHS/L37E | 8.0  | 1.7 (0.1)  | 5.1 (0.1)                                                  | 8.8 (0.2)                                                       | -3.1 (0.2)                                                            |
| $\Delta$ +PHS/L38E | 3.9  | 1.8 (0.1)  | 4.6 (0.1)                                                  | 8.3 (0.2)                                                       | -1.2 (0.2)                                                            |
| $\Delta$ +PHS/L38E | 4.5  | 2.0 (0.1)  | 4.7 (0.1)                                                  | 9.3 (0.1)                                                       | -2.0 (0.2)                                                            |
| $\Delta$ +PHS/L38E | 5.0  | 1.9 (0.1)  | 5.0 (0.1)                                                  | 9.5 (0.2)                                                       | -2.3 (0.3)                                                            |
| $\Delta$ +PHS/L38E | 5.9  | 1.7 (0.1)  | 4.9 (0.1)                                                  | 8.3 (0.1)                                                       | -3.4 (0.2)                                                            |
| $\Delta$ +PHS/L38E | 7.0  | 1.5 (0.1)  | 4.9 (0.3)                                                  | 7.3 (0.4)                                                       | -4.6 (0.4)                                                            |
| $\Delta$ +PHS/L38E | 7.9  | 1.4 (0.1)  | 5.0 (0.2)                                                  | 6.9 (0.3)                                                       | -5.0 (0.3)                                                            |
| $\Delta$ +PHS/L38E | 9.0  | 1.3 (0.1)  | 5.3 (0.1)                                                  | 6.9 (0.1)                                                       | -4.6 (0.2)                                                            |
| $\Delta$ +PHS/L38E | 10.0 | 1.1 (0.1)  | 5.3 (0.2)                                                  | 5.9 (0.2)                                                       | -4.4 (0.2)                                                            |
| $\Delta$ +PHS/V39E | 3.9  | 1.2 (0.1)  | 4.9 (0.1)                                                  | 5.6 (0.1)                                                       | -3.9 (0.2)                                                            |
| $\Delta$ +PHS/V39E | 4.9  | 1.4 (0.1)  | 5.3 (0.1)                                                  | 7.5 (0.2)                                                       | -4.2 (0.2)                                                            |
| $\Delta$ +PHS/V39E | 6.0  | 1.2 (0.1)  | 5.6 (0.2)                                                  | 7.0 (0.2)                                                       | -4.7 (0.2)                                                            |
| $\Delta$ +PHS/V39E | 7.0  | 1.1 (0.1)  | 6.0 (0.2)                                                  | 6.5 (0.2)                                                       | -5.4 (0.2)                                                            |
| $\Delta$ +PHS/V39E | 7.9  | 0.9 (0.1)  | 5.9 (0.1)                                                  | 5.3 (0.1)                                                       | -6.6 (0.2)                                                            |
| $\Delta$ +PHS/V39E | 9.1  | 0.8 (0.1)  | 5.8 (0.1)                                                  | 4.4 (0.1)                                                       | -7.2 (0.2)                                                            |

| PROTEINS    | pH   | $C_m$ [M]* | $m$ (kcal mol <sup>-1</sup> M <sup>-1</sup> ) <sup>†</sup> | $\Delta G^\circ_{H_2O}$ (kcal/mol) <sup>‡</sup> | $\Delta\Delta G^\circ_{H_2O}$ (kcal/mol) <sup>§</sup> |
|-------------|------|------------|------------------------------------------------------------|-------------------------------------------------|-------------------------------------------------------|
| Δ+PHS/V39E  | 10.0 | 0.5 (0.1)  | 6.1 (0.1)                                                  | 3.2 (0.1)                                       | -7.1 (0.2)                                            |
| Δ+PHS/T41E  | 3.9  | 1.6 (0.1)  | 4.6 (0.1)                                                  | 7.3 (0.1)                                       | -2.1 (0.2)                                            |
| Δ+PHS/T41E  | 5.0  | 1.8 (0.1)  | 5.2 (0.1)                                                  | 9.2 (0.1)                                       | -2.6 (0.2)                                            |
| Δ+PHS/T41E  | 6.0  | 1.6 (0.1)  | 5.3 (0.1)                                                  | 8.7 (0.2)                                       | -3.0 (0.2)                                            |
| Δ+PHS/T41E  | 7.0  | 1.5 (0.1)  | 5.4 (0.1)                                                  | 8.2 (0.1)                                       | -3.7 (0.2)                                            |
| Δ+PHS/T41E  | 8.0  | 1.5 (0.1)  | 5.2 (0.1)                                                  | 7.6 (0.1)                                       | -4.3 (0.2)                                            |
| Δ+PHS/T41E  | 9.0  | 1.4 (0.1)  | 5.3 (0.1)                                                  | 7.6 (0.1)                                       | -4.0 (0.2)                                            |
| Δ+PHS/A58E  | 3.9  | 1.2 (0.1)  | 4.6 (0.1)                                                  | 5.7 (0.1)                                       | -3.8 (0.2)                                            |
| Δ+PHS/A58E  | 4.9  | 1.4 (0.1)  | 5.3 (0.1)                                                  | 7.5 (0.1)                                       | -4.2 (0.2)                                            |
| Δ+PHS/A58E  | 5.9  | 1.2 (0.1)  | 5.5 (0.1)                                                  | 6.9 (0.1)                                       | -4.8 (0.2)                                            |
| Δ+PHS/A58E  | 7.0  | 1.1 (0.1)  | 5.6 (0.1)                                                  | 6.1 (0.1)                                       | -5.8 (0.2)                                            |
| Δ+PHS/A58E  | 8.0  | 0.9 (0.1)  | 5.3 (0.1)                                                  | 5.0 (0.1)                                       | -6.9 (0.2)                                            |
| Δ+PHS/A58E  | 9.0  | 0.9 (0.1)  | 5.4 (0.1)                                                  | 4.7 (0.1)                                       | -6.9 (0.2)                                            |
| Δ+PHS/A58E  | 9.9  | 0.7 (0.1)  | 5.6 (0.1)                                                  | 3.9 (0.1)                                       | -6.4 (0.2)                                            |
| Δ+PHS/T62E  | 3.9  | 1.5 (0.1)  | 4.6 (0.1)                                                  | 7.0 (0.1)                                       | -2.5 (0.2)                                            |
| Δ+PHS/T62E  | 5.0  | 1.7 (0.1)  | 5.2 (0.1)                                                  | 8.6 (0.2)                                       | -3.2 (0.3)                                            |
| Δ+PHS/T62E  | 6.0  | 1.4 (0.1)  | 5.3 (0.1)                                                  | 7.5 (0.1)                                       | -4.2 (0.2)                                            |
| Δ+PHS/T62E  | 7.0  | 1.1 (0.1)  | 5.7 (0.1)                                                  | 6.5 (0.1)                                       | -5.4 (0.2)                                            |
| Δ+PHS/T62E  | 7.9  | 1.0 (0.1)  | 5.5 (0.1)                                                  | 5.6 (0.1)                                       | -6.3 (0.2)                                            |
| Δ+PHS/T62E  | 9.0  | 0.9 (0.1)  | 5.5 (0.1)                                                  | 4.9 (0.1)                                       | -6.7 (0.2)                                            |
| Δ+PHS/T62E  | 9.9  | 0.7 (0.1)  | 5.9 (0.1)                                                  | 3.8 (0.1)                                       | -6.5 (0.2)                                            |
| Δ+PHS/I72E  | 3.9  | 1.0 (0.1)  | 4.9 (0.1)                                                  | 4.8 (0.1)                                       | -4.7 (0.2)                                            |
| Δ+PHS/I72E  | 4.9  | 1.2 (0.1)  | 5.1 (0.1)                                                  | 6.3 (0.2)                                       | -5.4 (0.2)                                            |
| Δ+PHS/I72E  | 6.0  | 1.0 (0.1)  | 5.5 (0.2)                                                  | 5.2 (0.2)                                       | -6.5 (0.2)                                            |
| Δ+PHS/I72E  | 7.0  | 0.8 (0.1)  | 5.7 (0.1)                                                  | 4.6 (0.1)                                       | -7.3 (0.2)                                            |
| Δ+PHS/I72E  | 8.0  | 0.6 (0.1)  | 5.8 (0.1)                                                  | 3.7 (0.1)                                       | -8.2 (0.2)                                            |
| Δ+PHS/I72E  | 9.0  | 0.5 (0.1)  | 5.6 (0.1)                                                  | 3.1 (0.1)                                       | -8.5 (0.2)                                            |
| Δ+PHS/I72E  | 10.0 | 0.4 (0.1)  | 6.0 (0.1)                                                  | 2.1 (0.1)                                       | -8.0 (0.2)                                            |
| Δ+PHS/V74E  | 3.9  | 0.9 (0.1)  | 4.7 (0.1)                                                  | 4.1 (0.1)                                       | -5.4 (0.2)                                            |
| Δ+PHS/V74E  | 5.0  | 1.0 (0.1)  | 5.5 (0.1)                                                  | 5.7 (0.1)                                       | -6.1 (0.2)                                            |
| Δ+PHS/V74E  | 6.0  | 0.8 (0.1)  | 5.8 (0.1)                                                  | 4.9 (0.1)                                       | -6.8 (0.2)                                            |
| Δ+PHS/V74E  | 7.0  | 0.6 (0.1)  | 6.4 (0.1)                                                  | 4.0 (0.1)                                       | -7.9 (0.2)                                            |
| Δ+PHS/V74E  | 7.9  | 0.5 (0.1)  | 5.5 (0.1)                                                  | 2.7 (0.1)                                       | -9.2 (0.2)                                            |
| Δ+PHS/V74E  | 9.0  | 0.4 (0.1)  | 5.2 (0.1)                                                  | 2.1 (0.1)                                       | -9.4 (0.2)                                            |
| Δ+PHS/V74E  | 9.9  | 0.2 (0.1)  | 5.4 (0.1)                                                  | 1.2 (0.1)                                       | -9.1 (0.2)                                            |
| Δ+PHS/A90E  | 3.9  | 0.4 (0.1)  | 4.3 (0.1)                                                  | 1.9 (0.1)                                       | -7.5 (0.2)                                            |
| Δ+PHS/A90E  | 4.9  | 0.8 (0.1)  | 5.7 (0.2)                                                  | 4.7 (0.1)                                       | -7.1 (0.2)                                            |
| Δ+PHS/A90E  | 5.9  | 0.7 (0.1)  | 5.7 (0.2)                                                  | 4.0 (0.1)                                       | -7.7 (0.2)                                            |
| Δ+PHS/A90E  | 7.0  | 0.6 (0.1)  | 6.0 (0.1)                                                  | 3.8 (0.1)                                       | -8.1 (0.2)                                            |
| Δ+PHS/A90E  | 8.0  | 0.6 (0.1)  | 5.4 (0.2)                                                  | 3.3 (0.2)                                       | -8.6 (0.2)                                            |
| Δ+PHS/A90E  | 9.1  | 0.6 (0.1)  | 5.7 (0.1)                                                  | 3.3 (0.1)                                       | -8.2 (0.2)                                            |
| Δ+PHS/A90E  | 10.0 | 0.4 (0.1)  | 5.8 (0.1)                                                  | 2.2 (0.1)                                       | -8.1 (0.2)                                            |
| Δ+PHS/Y91E  | 3.9  | 1.0 (0.1)  | 4.7 (0.1)                                                  | 4.5 (0.1)                                       | -5.0 (0.2)                                            |
| Δ+PHS/Y91E  | 4.9  | 1.2 (0.1)  | 5.3 (0.1)                                                  | 6.3 (0.1)                                       | -5.4 (0.2)                                            |
| Δ+PHS/Y91E  | 6.0  | 0.9 (0.1)  | 5.0 (0.4)                                                  | 4.4 (0.4)                                       | -7.3 (0.4)                                            |
| Δ+PHS/Y91E  | 7.0  | 0.7 (0.1)  | 5.3 (0.1)                                                  | 3.7 (0.1)                                       | -8.2 (0.2)                                            |
| Δ+PHS/Y91E  | 7.9  | 0.6 (0.1)  | 5.2 (0.3)                                                  | 3.2 (0.2)                                       | -8.7 (0.2)                                            |
| Δ+PHS/Y91E  | 9.0  | 0.6 (0.1)  | 5.4 (0.1)                                                  | 3.0 (0.1)                                       | -8.6 (0.2)                                            |
| Δ+PHS/Y91E  | 10.0 | 0.4 (0.1)  | 5.4 (0.1)                                                  | 2.1 (0.1)                                       | -8.2 (0.2)                                            |
| Δ+PHS/I92E  | 3.9  | 0.8 (0.1)  | 5.0 (0.1)                                                  | 3.9 (0.1)                                       | -5.6 (0.2)                                            |
| Δ+PHS/I92E  | 4.9  | 1.0 (0.1)  | 5.9 (0.1)                                                  | 5.9 (0.1)                                       | -5.8 (0.2)                                            |
| Δ+PHS/I92E  | 6.0  | 0.8 (0.1)  | 6.2 (0.1)                                                  | 5.0 (0.1)                                       | -6.7 (0.2)                                            |
| Δ+PHS/I92E  | 7.0  | 0.6 (0.1)  | 6.3 (0.1)                                                  | 4.0 (0.1)                                       | -7.9 (0.2)                                            |
| Δ+PHS/I92E  | 7.9  | 0.4 (0.1)  | 6.4 (0.1)                                                  | 2.7 (0.1)                                       | -9.2 (0.2)                                            |
| Δ+PHS/I92E  | 9.0  | 0.2 (0.1)  | 6.7 (0.1)                                                  | 1.4 (0.1)                                       | -10.1 (0.2)                                           |
| Δ+PHS/V99E  | 3.9  | 0.9 (0.1)  | 5.1 (0.1)                                                  | 4.7 (0.1)                                       | -4.8 (0.2)                                            |
| Δ+PHS/V99E  | 4.9  | 1.1 (0.1)  | 5.4 (0.1)                                                  | 6.2 (0.1)                                       | -5.5 (0.2)                                            |
| Δ+PHS/V99E  | 6.0  | 0.9 (0.1)  | 5.6 (0.2)                                                  | 5.3 (0.2)                                       | -6.4 (0.2)                                            |
| Δ+PHS/V99E  | 7.0  | 0.8 (0.1)  | 5.6 (0.2)                                                  | 4.4 (0.1)                                       | -7.5 (0.2)                                            |
| Δ+PHS/V99E  | 7.9  | 0.5 (0.1)  | 6.0 (0.1)                                                  | 3.2 (0.1)                                       | -8.7 (0.2)                                            |
| Δ+PHS/V99E  | 9.0  | 0.3 (0.1)  | 6.4 (0.1)                                                  | 2.1 (0.1)                                       | -9.5 (0.2)                                            |
| Δ+PHS/N100E | 3.9  | 2.0 (0.1)  | 4.7 (0.1)                                                  | 9.5 (0.2)                                       | 0.1 (0.2)                                             |
| Δ+PHS/N100E | 5.0  | 2.1 (0.1)  | 5.0 (0.1)                                                  | 10.6 (0.3)                                      | -1.2 (0.3)                                            |
| Δ+PHS/N100E | 6.0  | 1.9 (0.1)  | 5.0 (0.1)                                                  | 9.3 (0.2)                                       | -2.4 (0.2)                                            |
| Δ+PHS/N100E | 7.0  | 1.6 (0.1)  | 5.3 (0.1)                                                  | 8.5 (0.2)                                       | -3.4 (0.2)                                            |
| Δ+PHS/N100E | 8.0  | 1.4 (0.1)  | 5.2 (0.2)                                                  | 7.4 (0.2)                                       | -4.4 (0.2)                                            |
| Δ+PHS/N100E | 9.0  | 1.3 (0.1)  | 5.6 (0.1)                                                  | 7.1 (0.2)                                       | -4.5 (0.2)                                            |
| Δ+PHSL103E  | 3.9  | 1.2 (0.1)  | 4.8 (0.1)                                                  | 5.7 (0.1)                                       | -3.8 (0.2)                                            |
| Δ+PHSL103E  | 5.0  | 1.4 (0.1)  | 5.5 (0.1)                                                  | 7.6 (0.1)                                       | -4.2 (0.2)                                            |
| Δ+PHSL103E  | 6.0  | 1.2 (0.1)  | 5.6 (0.1)                                                  | 6.6 (0.1)                                       | -5.1 (0.2)                                            |
| Δ+PHSL103E  | 7.0  | 1.0 (0.1)  | 5.8 (0.1)                                                  | 5.7 (0.1)                                       | -6.2 (0.2)                                            |
| Δ+PHSL103E  | 8.0  | 0.8 (0.1)  | 5.9 (0.1)                                                  | 4.7 (0.1)                                       | -7.2 (0.2)                                            |

| PROTEINS            | pH   | $C_m$ [M]* | $m$ (kcal mol <sup>-1</sup> M <sup>-1</sup> ) <sup>†</sup> | $\Delta G^{\circ}_{H_2O}$ (kcal/mol) <sup>‡</sup> | $\Delta\Delta G^{\circ}_{H_2O}$ (kcal/mol) <sup>§</sup> |
|---------------------|------|------------|------------------------------------------------------------|---------------------------------------------------|---------------------------------------------------------|
| $\Delta$ +PHSL103E  | 9.0  | 0.6 (0.1)  | 6.1 (0.1)                                                  | 3.4 (0.1)                                         | -8.2 (0.2)                                              |
| $\Delta$ +PHSL103E  | 10.0 | 0.2 (0.1)  | 6.6 (0.1)                                                  | 1.2 (0.1)                                         | -8.9 (0.2)                                              |
| $\Delta$ +PHS/V104E | 3.9  | 1.5 (0.1)  | 5.0 (0.1)                                                  | 7.5 (0.2)                                         | -2.0 (0.2)                                              |
| $\Delta$ +PHS/V104E | 4.9  | 1.7 (0.1)  | 5.3 (0.1)                                                  | 8.9 (0.2)                                         | -2.8 (0.2)                                              |
| $\Delta$ +PHS/V104E | 5.5  | 1.6 (0.1)  | 5.3 (0.1)                                                  | 8.5 (0.2)                                         | -3.2 (0.2)                                              |
| $\Delta$ +PHS/V104E | 6.0  | 1.4 (0.1)  | 5.3 (0.2)                                                  | 7.6 (0.2)                                         | -4.1 (0.2)                                              |
| $\Delta$ +PHS/V104E | 7.0  | 1.2 (0.1)  | 5.6 (0.1)                                                  | 6.6 (0.1)                                         | -5.3 (0.1)                                              |
| $\Delta$ +PHS/V104E | 8.0  | 1.0 (0.1)  | 5.7 (0.1)                                                  | 5.4 (0.1)                                         | -6.5 (0.2)                                              |
| $\Delta$ +PHS/V104E | 9.0  | 0.7 (0.1)  | 5.9 (0.1)                                                  | 4.2 (0.1)                                         | -7.4 (0.1)                                              |
| $\Delta$ +PHS/V104E | 10.0 | 0.3 (0.1)  | 6.3 (0.1)                                                  | 1.8 (0.1)                                         | -8.5 (0.1)                                              |
| $\Delta$ +PHS/A109E | 3.9  | 1.1 (0.1)  | 4.5 (0.1)                                                  | 5.1 (0.1)                                         | -4.4 (0.2)                                              |
| $\Delta$ +PHS/A109E | 5.0  | 1.3 (0.1)  | 5.2 (0.1)                                                  | 6.8 (0.1)                                         | -5.0 (0.2)                                              |
| $\Delta$ +PHS/A109E | 6.0  | 1.1 (0.1)  | 5.4 (0.1)                                                  | 6.2 (0.1)                                         | -5.5 (0.2)                                              |
| $\Delta$ +PHS/A109E | 7.0  | 1.0 (0.1)  | 5.6 (0.1)                                                  | 5.4 (0.1)                                         | -6.5 (0.2)                                              |
| $\Delta$ +PHS/A109E | 7.9  | 0.8 (0.1)  | 5.4 (0.1)                                                  | 4.2 (0.1)                                         | -7.7 (0.2)                                              |
| $\Delta$ +PHS/A109E | 9.1  | 0.7 (0.1)  | 5.1 (0.1)                                                  | 3.4 (0.1)                                         | -8.1 (0.2)                                              |
| $\Delta$ +PHS/A109E | 10.0 | 0.4 (0.1)  | 5.2 (0.1)                                                  | 2.3 (0.1)                                         | -8.0 (0.2)                                              |
| $\Delta$ +PHS/N118E | 5.0  | 2.0 (0.1)  | 4.9 (0.1)                                                  | 9.9 (0.2)                                         | -1.9 (0.2)                                              |
| $\Delta$ +PHS/N118E | 7.0  | 1.9 (0.1)  | 5.1 (0.1)                                                  | 9.7 (0.1)                                         | -2.2 (0.2)                                              |
| $\Delta$ +PHS/N118E | 9.0  | 2.0 (0.1)  | 4.9 (0.2)                                                  | 9.7 (0.3)                                         | -1.9 (0.3)                                              |
| $\Delta$ +PHS/L125E | 3.9  | 1.2 (0.1)  | 4.8 (0.1)                                                  | 5.5 (0.1)                                         | -4.0 (0.2)                                              |
| $\Delta$ +PHS/L125E | 5.0  | 1.4 (0.1)  | 5.3 (0.1)                                                  | 7.2 (0.1)                                         | -4.6 (0.2)                                              |
| $\Delta$ +PHS/L125E | 6.0  | 1.1 (0.1)  | 5.4 (0.1)                                                  | 5.9 (0.1)                                         | -5.8 (0.2)                                              |
| $\Delta$ +PHS/L125E | 7.0  | 0.9 (0.1)  | 5.6 (0.1)                                                  | 5.2 (0.1)                                         | -6.7 (0.2)                                              |
| $\Delta$ +PHS/L125E | 7.9  | 0.7 (0.1)  | 5.3 (0.2)                                                  | 3.7 (0.1)                                         | -8.2 (0.2)                                              |
| $\Delta$ +PHS/L125E | 9.0  | 0.5 (0.1)  | 5.2 (0.1)                                                  | 2.5 (0.1)                                         | -9.1 (0.2)                                              |
| $\Delta$ +PHS/L125E | 10.0 | 0.1 (0.1)  | 4.7 (0.2)                                                  | 0.5 (0.1)                                         | -9.8 (0.2)                                              |
| $\Delta$ +PHS/A132E | 4.9  | 1.2 (0.1)  | 5.2 (0.1)                                                  | 6.0 (0.2)                                         | -5.8 (0.2)                                              |
| $\Delta$ +PHS/A132E | 6.0  | 0.9 (0.1)  | 5.2 (0.1)                                                  | 4.9 (0.1)                                         | -6.8 (0.2)                                              |
| $\Delta$ +PHS/A132E | 7.0  | 0.8 (0.1)  | 4.4 (0.2)                                                  | 3.7 (0.2)                                         | -8.2 (0.3)                                              |
| $\Delta$ +PHS/A132E | 7.9  | 0.9 (0.1)  | 4.4 (0.2)                                                  | 3.7 (0.2)                                         | -8.2 (0.2)                                              |
| $\Delta$ +PHS/A132E | 9.0  | 0.8 (0.1)  | 3.9 (0.2)                                                  | 3.0 (0.3)                                         | -8.5 (0.3)                                              |
| $\Delta$ +PHS/A132E | 10.0 | 0.7 (0.1)  | 3.4 (0.3)                                                  | 2.3 (0.2)                                         | -8.1 (0.2)                                              |

The data for  $\Delta$ +PHS and its V66E variant were published previously (refs. 1, 2, 3, and 4). The data at pH 7 and 10 for the Glu-containing variant was published previously (1).

- 1 Isom DG, et al. (2008) High tolerance for ionizable residues in the hydrophobic interior of proteins. *Proc Natl Acad Sci USA* 105:17784–17788.
- 2 Dwyer J, et al. (2000) High apparent dielectric constants in the interior of a protein reflect water penetration. *Biophysical Journal* 79:1610–1620.
- 3 Fitch CA, et al. (2002) Experimental pKa values of buried residues: analysis with continuum methods and role of water penetration. *Biophysical Journal* 82:3289–3304.
- 4 Karp DA, Stahley MR, Garcia-Moreno E.B (2010) Conformational consequences of ionization of Lys, Asp, and Glu buried at position 66 in staphylococcal nuclease. *Biochemistry* 49:4138–4146.

\*Midpoint of the GdnHCl denaturation curve analyzed with a two-state model.

<sup>†</sup>GdnHCl dependence of the equilibrium constant between native and denatured states.

<sup>‡</sup>Stability of the protein at 298 K obtained by analysis of GdnHCl denaturation curves using a two-state model and the linear extrapolation model.

<sup>§</sup>Difference in stability calculated at each pH value as:  $\Delta\Delta G^{\circ}_{H_2O} = \Delta G^{\circ}_{H_2O}(\text{Glu-containing variant}) - \Delta G^{\circ}_{H_2O}(\Delta\text{+PHS})$ .

**Table S2. Equilibrium thermodynamic parameters for base unfolding for 25 variants of SNase with internal Glu residues**

| Position | $pK_a^*$ | $pH_{mid} \cdot FL^\dagger$ | $pH_{mid} \cdot CD^\ddagger$ |
|----------|----------|-----------------------------|------------------------------|
| V104E    | 9.4      | 10.4                        | 10.4                         |
| L125E    | 9.1      | 10.1                        | 10.2                         |
| I92E     | 9.0      | 9.8                         | 9.6                          |
| L103E    | 8.9      | 10.3                        | 10.2                         |
| L36E     | 8.7      | 10.3                        | 10.3                         |
| V66E     | 8.5      | 10.6                        | 10.5                         |
| V99E     | 8.4      | 10.1                        | 9.9                          |
| V39E     | 8.2      | 10.7                        | 10.7                         |
| A109E    | 7.9      | 10.4                        | 10.5                         |
| V74E     | 7.8      | 10.4                        | 10.5                         |
| A58E     | 7.7      | 10.9                        | 10.8                         |
| T62E     | 7.7      | 10.7                        | 10.8                         |
| N100E    | 7.6      | 11.1                        | 11.1                         |
| L25E     | 7.5      | 10.4                        | 10.5                         |
| F34E     | 7.3      | 10.6                        | 10.7                         |
| I72E     | 7.3      | 10.5                        | 10.4                         |
| V23E     | 7.1      | 10.6                        | 10.6                         |
| Y91E     | 7.1      | 10.6                        | 10.6                         |
| A132E    | 7.0      | NA                          | 10.8                         |
| L38E     | 6.8      | 11.2                        | 11.0                         |
| T41E     | 6.8      | 11.2                        | 11.3                         |
| A90E     | 6.4      | 10.6                        | 10.5                         |
| L37E     | 5.2      | 10.9                        | 11.4                         |
| G20E     | 4.5      | 11.3                        | 11.4                         |
| N118E    | 4.5      | 11.7                        | 11.7                         |

\*Apparent  $pK_a$  values. Estimated error was 0.2  $pK_a$  units for all but Glu-37 and Glu-90, which have an estimated error of 0.5  $pK_a$  units.

†Midpoint of the major base unfolding transition monitored by Trp fluorescence or by CD. In all cases, the experimental uncertainty is 0.1 pH units
